# Supplementary material
Source: PubMed Central journal article supplement (PMC6222097)
Supplement: supp_RA118.004461_138814_2_supp_202245_pf0dn8.pdf [file supp_RA118.004461_138814_2_supp_202245_pf0dn8.pdf]

Supporting Information to

**Quaternary Structure of the Small Amino Acid Transporter OprG of  
*Pseudomonas aeruginosa***

Raghavendar Reddy Sanganna Gari, Patrick Seelheim, Brendan Marsh, Volker Kiessling,  
Carl E. Creutz, and Lukas K. Tamm

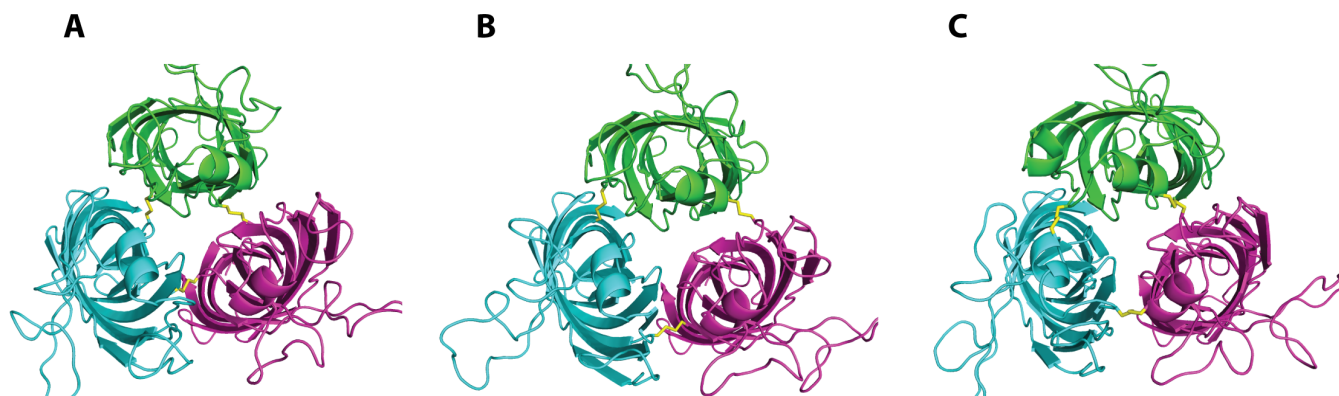

**Supplementary Figure 1:** **A.** Disulfide-linked trimer of T65C-L120C OprG based on the homology model of Figure 1B. **B.** Disulfide-linked trimer of Q44C-D142C OprG based on the homology model of Figure1B. **C.** Disulfide-linked trimer of S128C-S137C OprG based on the homology model of Figure 1B.

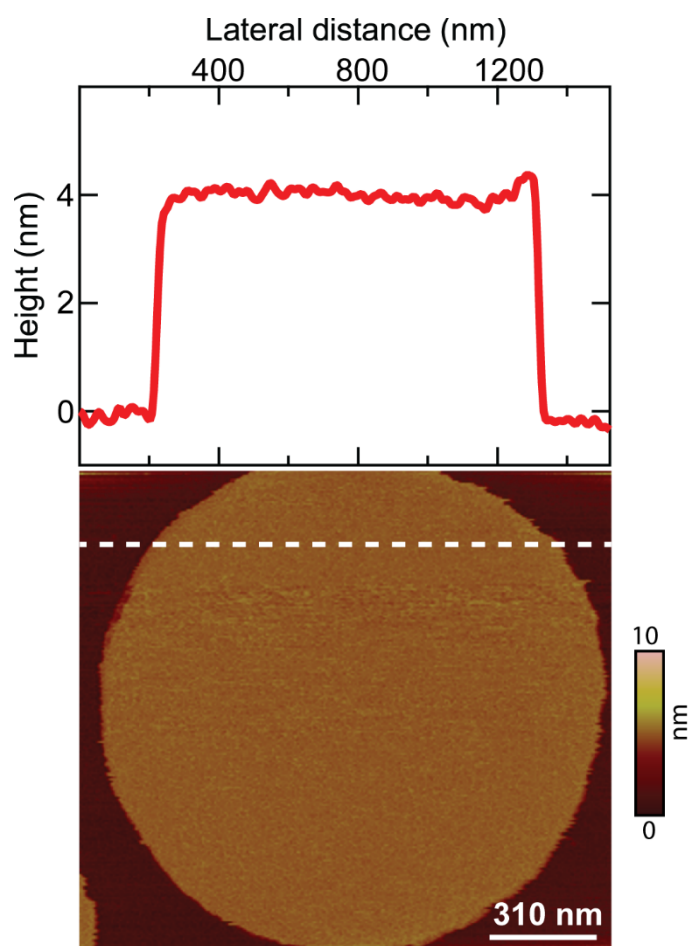

**Supplementary Figure 2:** AFM imaging of pure supported lipid bilayers of POPE:POPG (80:20) in the absence of OprG proteins. The cross-section profile (red line at the top) shows that the lipid bilayer has a height of  $\sim 4$  nm above the mica substrate. The location of the cross-section is shown as a white dashed line in the image below. These membranes show no protrusions as expected for a protein-free bilayer.

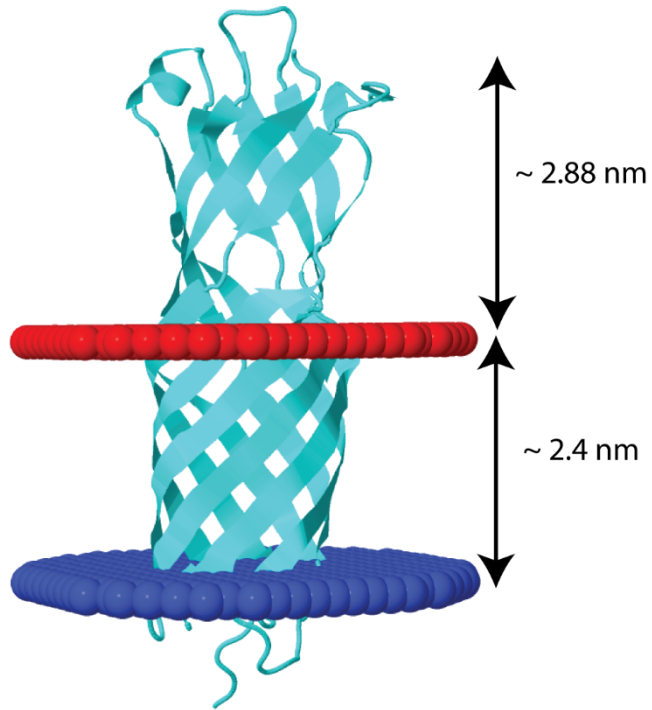

**Supplementary Figure 3:** Crystal structure of OprG (PDB entry 2X27): The hydrophobic thickness of the lipid bilayer is  $\sim 2.4$  nm as provided by the Orientations of Proteins in Membranes (OPM) database (1). The protein height above this lipid bilayer is  $\sim 2.88$  nm. However, the typical height of the lipid bilayer observed by AFM  $\sim 4$  nm. Therefore, the height of the extracellular protrusion may be estimated as  $1.28$  nm ( $2.4$  nm +  $2.88$  nm -  $4$  nm). The expected height of the periplasmic protrusion is smaller than  $1$  nm.

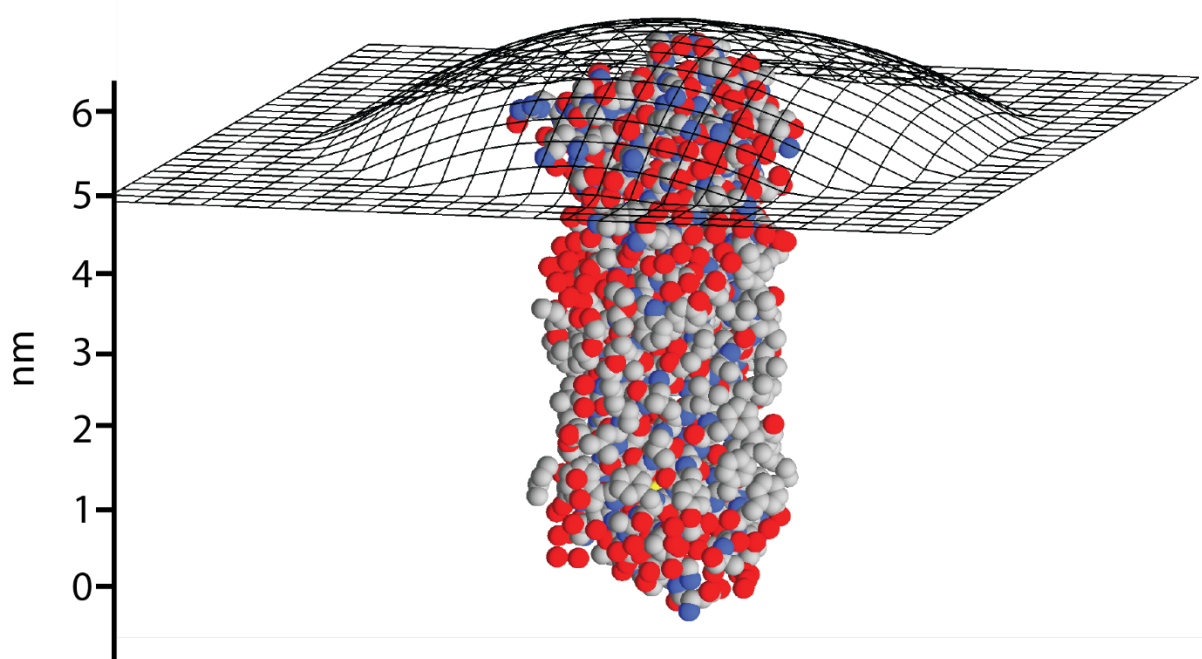

**Supplementary Figure 4:** Simulated AFM image using PDB coordinates (2X27) of OprG. The volume of the extracellular protrusion is  $0.8 \times 10^5 \text{ \AA}^3$ .

**Method to construct a simulated AFM image from a crystal structure:** To construct a simulated AFM image of OprG, we computed the morphological dilation between the crystal structure of OprG and a standard AFM tip geometry. OprG was modelled from its crystal structure (PDB entry 2X27(2)) where each atom was represented by a sphere with its van der Waals radius. The AFM tip was modelled as an isotropic paraboloid, with an effective radius of  $R_x=R_y=10 \text{ nm}$  (i.e., the standard specification from the manufacturer, BL-AC40TS, Olympus). A simulated AFM image (black wireframe) was then computed as a dilation of the OprG model by the AFM tip model using custom software (WaveMetrics, Inc., Lake Oswego, OR 97035, USA).

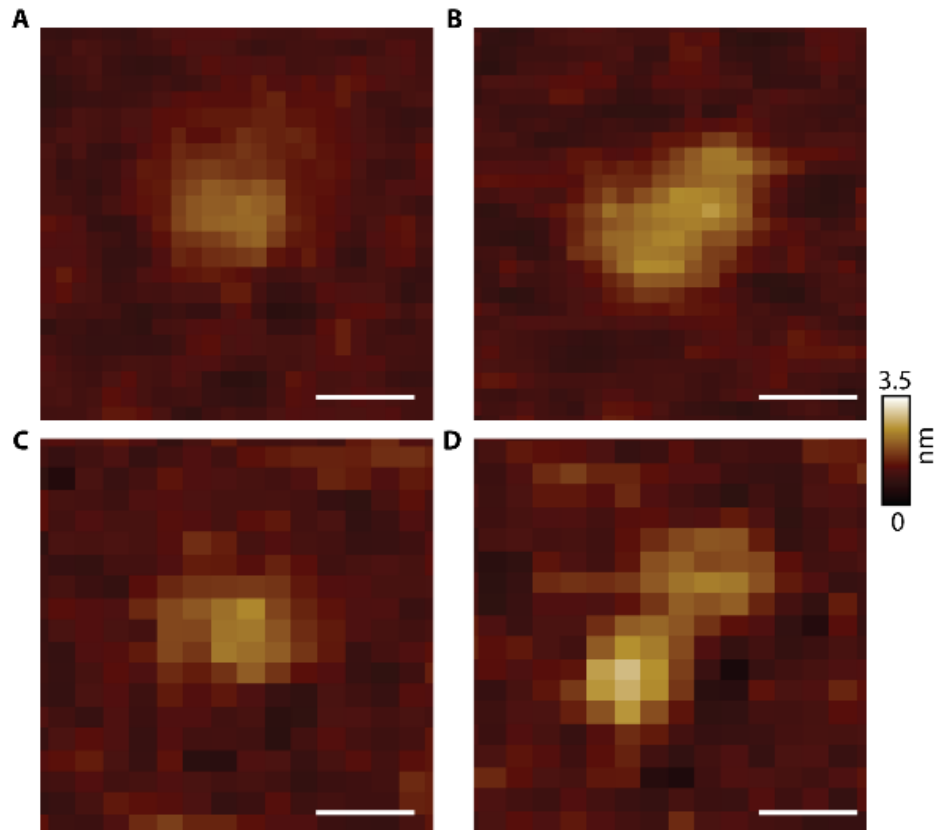

**Supplementary Figure 5:** Representative protrusions of monomeric and dimeric OprG. **A, C,** Monomers with heights of  $\sim 1$  nm and  $\sim 1.2$  nm and volumes  $\sim 1.5 \times 10^5 \text{ \AA}^3$  and  $\sim 1.3 \times 10^5 \text{ \AA}^3$ , respectively. **B, D,** Dimers with heights of  $\sim 1.3$  and  $\sim 1.4$  nm and volumes of  $\sim 2.5 \times 10^5 \text{ \AA}^3$ , respectively.

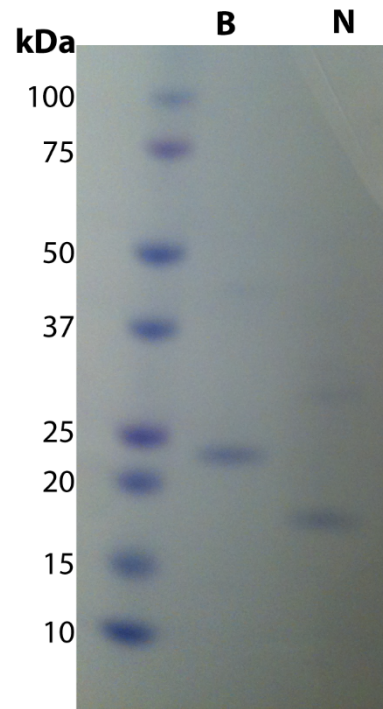

**Supplementary Figure 6:** Refolding of Alexa-647 labelled G134C OprG in  $\beta$ -octylglucoside detergent. SDS-PAGE gel showing boiled (B) and refolded (N) G134C OprG. G134C OprG exhibited a shift from about 29 kDa to 24 kDa upon refolding in  $\beta$ -octylglucoside.

**Supplementary Table 1:**

Primers used

| #  | Name                 | Sequence (5'->3')                                        |
|----|----------------------|----------------------------------------------------------|
| 1  | oprG_HERD<br>30T_fw  | GTTTAACTTTAAGAAGGAGATATACATACCCATGCGTAAG<br>TCCTGGCTTACC |
| 2  | oprG_HERD<br>30T_rv  | GCCTGCAGGTCGACTCTAGAGGATCCCCGGGTCAGAACTT<br>GTAGCCGAAACC |
| 3  | ST2_into_opr<br>G_fw | <b>CAGTTCGAGAAGGGCTCGGGCGGATATTCAAGGACACAA</b><br>GGCCG  |
| 4  | ST2_into_opr<br>G_rv | <b>CGGGTGCGACCAGCTTGCAGCGGCGAACGGGGAGGC</b>              |
| 5  | Q44C_fw              | GACTGTCGACAGCGACACCTGTCTCGGCCTGACCTTC                    |
| 6  | Q44C_rv              | GAAGGTCAGGCCGAGACAGGTGTCGCTGTCGACAGTC                    |
| 7  | L90C_fw              | CTGGCCGACATCAAGCAATGTCCGCCGACCCTGCTG                     |
| 8  | L90C_rv              | CAGCAGGGTCGGCGGACATTGCTTGATGTCGGCCAG                     |
| 9  | T120C_fw             | CTGGGCGTGAACCTACACCTGCTTCTTCGACGAAGACC                   |
| 10 | T120C_rv             | GGTCTTCGTCGAAGAAGCAGGTGTAGTTCACGCCAG                     |
| 11 | S128C_rv             | CTGCGCCTTGC GGTTGCAGGCGAGGTCTTCGTCG                      |
| 12 | S136C_fw             | CGCAAGGCGCAGGGTTTCTGCAGCATGAAGCTGC                       |
| 13 | S137C_fw             | CGCAAGGCGCAGGGTTTCAGCTGCATGAAGCTGC                       |
| 14 | D142C_fw             | GCAGCATGAAGCTGCAGTGCTCCTGGGGCCTGG                        |
| 15 | D142C_rv             | CCAGGCCCCAGGAGCACTGCAGCTTCATGCTGC                        |
| 16 | ΔL1_fw               | GGCTTCGCCACCGTCGATCCCGACACCCAGCTCGGCCTG                  |
| 17 | ΔL1_rv               | CAGGCCGAGCTGGGTGTCGGGATCGACGGTGGCGAAGCC                  |
| 18 | ΔL2_fw               | GCCGCCACTCCGTTCAACCAACTGCCGCCGACCCTGC                    |
| 19 | ΔL2_rv               | GCAGGGTTCGGCGGCAGTTGGTTGAACGGAGTGGCGGC                   |
| 20 | ΔL3_fw               | GGCCTGGGCGTGAACCTACACCGACTCCTGGGGCCTGGCCG<br>GC          |
| 21 | ΔL3_rv               | GCCGGCCAGGCCCCAGGAGTCGGTGTAGTTCACGCCCAGG<br>CC           |
| 22 | ΔL4_fw               | GCCGTCTGGTACATGGACGATCCGTGGGTCTACATGATCG<br>G            |
| 23 | ΔL4_rv               | CCGATCATGTAGACCCACGGATCGTCCATGTACCAGACGG<br>C            |

Base changes and insertions are highlighted in bold.



## References

1. Lomize MA, Pogozheva ID, Joo H, Mosberg HI, Lomize AL. OPM database and PPM web server: Resources for positioning of proteins in membranes. *Nucleic Acids Res.* 2012; 40(D1): D370-D376.
2. Touw DS, Patel DR, Van Den Berg B. The crystal structure of OprG from *Pseudomonas aeruginosa*, a potential channel for transport of hydrophobic molecules across the outer membrane. *PloS one.* 2010; 5(11): e15016.
